# Supplementary material for: Multi-ancestry sleep-by-SNP interaction analysis in 126,926 individuals reveals lipid loci stratified by sleep duration
Source: PubMed Central journal article supplement (PMC6851116; doi:10.1038/s41467-019-12958-0), 2019-11-12
Supplement: 41467_2019_12958_MOESM19_ESM.pdf [file 41467_2019_12958_MOESM19_ESM.pdf]

**Title: Supplementary Data 1**

**Description:** Trait Distribution in Stage 1 studies

**Title: Supplementary Data 2**

**Description:** Trait Distribution in Stage 2 studies

**Title: Supplementary Data 3**

**Description:** Replicated lead SNPs from known regions for blood lipid levels in multi-ancestry cohorts - Long Total Sleep Time

**Title: Supplementary Data 4**

**Description:** Replicated leads SNPs from known regions for blood lipid levels in multi-ancestry cohorts - Short Total Sleep Time

**Title: Supplementary Data 5**

**Description:** Interaction effects of known SNPs with either LTST or STST

**Title: Supplementary Data 6**

**Description:** Replicated novel lead SNPs for blood lipid levels in multi-ancestry cohorts - Long Total Sleep Time

**Title: Supplementary Data 7**

**Description:** Replicated novel lead SNPs for blood lipid levels in multi-ancestry cohorts - Short Total Sleep Time

**Title: Supplementary Data 8**

**Description:** Replicated novel lead SNPs for blood lipid levels in European ancestry cohorts - Long Total Sleep Time

**Title: Supplementary Data 9**

**Description:** Replicated novel lead SNPs for blood lipid levels in European ancestry cohorts - Short Total Sleep Time

**Title: Supplementary Data 10**

**Description:** SNP main effects stratified by exposure to LTST in the multi-ancestry meta-analyses based on the discovery cohorts

**Title: Supplementary Data 11**

**Description:** SNP main effects stratified by exposure to STST in the multi-ancestry meta-analyses based on the discovery cohorts

**Title: Supplementary Data 12**

**Description:** Look-up of newly identified loci on different questionnaire-based sleep phenotypes in the UK Biobank

**Title: Supplementary Data 13**

**Description:** Look-up of newly identified loci on different accelerometer-based sleep phenotypes in the UK Biobank

**Title: Supplementary Data 14**

**Description:** gene look-up in the GWAS catalog ( $p < 5e-8$ ), *italic font* indicates sleep-related trait ( $p > 5e-8$ )

**Title: Supplementary Data 15**

**Description:** Differential expression data of novel SNPs in different tissues from the GTEx database
